# Supplementary material
Source: Research Square preprint supplement (doi:10.21203/rs.3.rs-8968998/v2)

# Channel Ablation: Single → Dual → Triple Channel Comparison

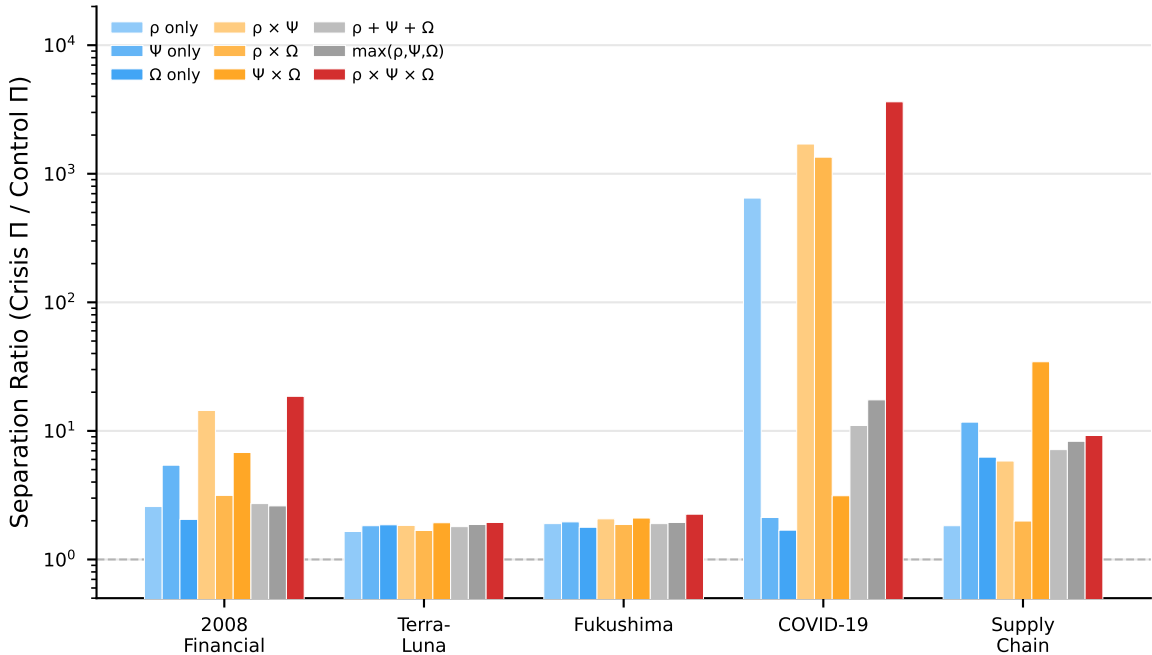

Supplement: Supplementary file 1 [file 92e3b33610223e60cc9422fe.pdf]
